# Supplementary material for: The Expression and Function of lincRNA-154324 and the Adjoining Protein-Coding Gene vmp1 in the Caudal Fin Regeneration of Zebrafish
Source: MDPI journal article supplement (doi:10.3390/ijms23168944), 2022-08-11
Supplement: s1 [file s1]

## Supplemental table

Table S1

| GeneID              | CK0dpa_fpk  | T3dpa_fpk   | log2(FC)     | Pvalue      | FDR         | significant | Symbol             |
|---------------------|-------------|-------------|--------------|-------------|-------------|-------------|--------------------|
| ENSDART00000007434  | 6.01        | 0.813333333 | -2.885446344 | 7.23E-15    | 2.28E-12    | yes         | BX005421.1         |
| ENSDART000000059613 | 1.743333333 | 0.51        | -1.773279294 | 0.024177164 | 0.20403566  | no          | BX005421.2         |
| ENSDART000000082740 | 1.65        | 4.303333333 | 1.38298857   | 6.61E-09    | 5.90E-07    | yes         | CT573494.2         |
| ENSDART000000087449 | 0.096666667 | 0.98        | 3.34169135   | 6.56E-13    | 1.37E-10    | yes         | CR847968.1         |
| ENSDART00000133496  | 7.163333333 | 2.18        | -1.716302942 | 0.001506597 | 0.026310396 | yes         | CU467110.1         |
| ENSDART00000136012  | 0.743333333 | 2.016666667 | 1.439891432  | 4.58E-08    | 3.09E-06    | yes         | CR388373.2         |
| ENSDART00000137680  | 0.023333333 | 0.433333333 | 4.215012891  | 7.64E-06    | 0.000347058 | yes         | BX663503.1         |
| ENSDART00000139663  | 0.443333333 | 1.24        | 1.483876376  | 0.041239933 | 0.290775041 | no          | CR391910.2         |
| ENSDART00000141092  | 5.733333333 | 2.176666667 | -1.397253668 | 0.03023909  | 0.23980078  | no          | BX469930.1         |
| ENSDART00000142561  | 1.486666667 | 0.093333333 | -3.993544978 | 0.000999383 | 0.018630294 | yes         | BX323590.2         |
| ENSDART00000143303  | 2.286666667 | 0.86        | -1.410837511 | 0.019547572 | 0.177855236 | no          | BX323590.2         |
| ENSDART00000144687  | 6.893333333 | 0.863333333 | -2.997212183 | 9.47E-09    | 7.54E-07    | yes         | CABZ010158<br>15.1 |
| ENSDART00000145442  | 0.176666667 | 0.56        | 1.664396968  | 0.041439517 | 0.290775041 | no          | CR936321.1         |
| ENSDART00000145963  | 0.853333333 | 1.82        | 1.092757141  | 0.000279348 | 0.006978113 | yes         | CR391990.1         |
| ENSDART00000148196  | 25.91       | 5.576666667 | -2.216034071 | 2.10E-07    | 1.25E-05    | yes         | AL929237.1         |
| ENSDART00000148329  | 1.373333333 | 0.306666667 | -2.162938571 | 0.000672389 | 0.013780918 | yes         | BX088709.1         |
| ENSDART00000150088  | 0.07        | 1.51        | 4.431049817  | 3.77E-05    | 0.001359578 | yes         | BX649485.2         |
| ENSDART00000150683  | 1.863333333 | 0.48        | -1.956779471 | 0.001489114 | 0.026195815 | yes         | mhc1zda            |
| ENSDART00000151148  | 0.363333333 | 0.001       | -8.505149919 | 0.036033808 | 0.264134315 | no          | BX957317.2         |
| ENSDART00000151887  | 0.323333333 | 1.683333333 | 2.380226735  | 0.000334393 | 0.008031868 | yes         | BX901907.5         |
| ENSDART00000153157  | 0.001       | 0.253333333 | 7.984893108  | 0.046252695 | 0.31311445  | no          | CR749163.1         |
| ENSDART00000153298  | 10.13       | 36.55666667 | 1.851500354  | 7.29E-15    | 2.28E-12    | yes         | AL732488.1         |
| ENSDART00000153366  | 0.06        | 1.006666667 | 4.068479738  | 0.00063544  | 0.013338908 | yes         | CR382372.1         |
| ENSDART00000153475  | 1.96        | 3.943333333 | 1.008562014  | 1.48E-05    | 0.000607842 | yes         | CU467861.1         |
| ENSDART00000153479  | 0.37        | 0.01        | -5.209453366 | 0.006328905 | 0.083648707 | no          | CR377211.3         |
| ENSDART00000153498  | 0.25        | 1.026666667 | 2.03796785   | 0.000293568 | 0.007260716 | yes         | BX294100.1         |
| ENSDART00000153691  | 1.443333333 | 3.803333333 | 1.397859862  | 3.01E-05    | 0.001121817 | yes         | CU928129.1         |
| ENSDART00000153803  | 0.416666667 | 1.843333333 | 2.145351386  | 2.89E-06    | 0.000144153 | yes         | CU466287.2         |
| ENSDART00000154176  | 58.17       | 22.69333333 | -1.358006768 | 0.026731243 | 0.2172617   | no          | BX537305.1         |
| ENSDART00000154290  | 0.033333333 | 0.223333333 | 2.744161096  | 0.034003749 | 0.255079175 | no          | CU972512.1         |
| ENSDART00000154324  | 0.09        | 1.006666667 | 3.483517237  | 8.20E-06    | 0.000365895 | yes         | CR848791.3         |
| ENSDART00000154910  | 3.796666667 | 0.683333333 | -2.474071932 | 3.81E-05    | 0.001359578 | yes         | BX005421.1         |
| ENSDART00000155099  | 0.94        | 0.116666667 | -3.010268335 | 0.01957974  | 0.177855236 | no          | CR354430.3         |
| ENSDART00000155205  | 0.001       | 2.983333333 | 11.54270947  | 1.63E-10    | 1.93E-08    | yes         | CU927934.1         |
| ENSDART00000155306  | 2.51        | 8.25        | 1.716706755  | 7.93E-07    | 4.40E-05    | yes         | CR925728.1         |
| ENSDART00000155541  | 69.42666667 | 5.64        | -3.621722838 | 2.47E-09    | 2.37E-07    | yes         | CU693494.2         |

|                    |             |             |              |             |             |     |                    |
|--------------------|-------------|-------------|--------------|-------------|-------------|-----|--------------------|
| ENSDART00000155766 | 0.06        | 0.186666667 | 1.637429921  | 0.039526831 | 0.282108636 | no  | BX957317.2         |
| ENSDART00000155782 | 0.33        | 0.001       | -8.366322214 | 0.016239693 | 0.163500813 | no  | CU693494.3         |
| ENSDART00000155800 | 0.54        | 1.273333333 | 1.237578825  | 0.008453823 | 0.101244796 | no  | CR759845.1         |
| ENSDART00000155813 | 0.001       | 0.283333333 | 8.14635653   | 0.000894671 | 0.017060221 | yes | CU927934.3         |
| ENSDART00000155964 | 0.013333333 | 0.186666667 | 3.807354922  | 0.015618976 | 0.159902462 | no  | CR628341.1         |
| ENSDART00000156268 | 1.96        | 3.943333333 | 1.008562014  | 1.48E-05    | 0.000607842 | yes | CU467861.1         |
| ENSDART00000156279 | 0.983333333 | 1.99        | 1.017015977  | 0.000606723 | 0.012844017 | yes | BX890558.1         |
| ENSDART00000156294 | 4.79        | 1.303333333 | -1.877819549 | 0.00057497  | 0.012598906 | yes | CR848667.1         |
| ENSDART00000156448 | 0.113333333 | 1.096666667 | 3.274480932  | 9.28E-05    | 0.002727767 | yes | zgc:194207         |
| ENSDART00000156913 | 0.133333333 | 0.43        | 1.689299161  | 0.001907711 | 0.032418116 | yes | BX927184.1         |
| ENSDART00000158002 | 0.01        | 0.206666667 | 4.36923381   | 0.001846484 | 0.031592579 | yes | CR812832.1         |
| ENSDART00000158007 | 13.52       | 2.066666667 | -2.709717532 | 7.19E-10    | 7.34E-08    | yes | CU467961.1         |
| ENSDART00000158564 | 14.04333333 | 4.716666667 | -1.574045863 | 0.000443148 | 0.010107892 | yes | CU681842.1         |
| ENSDART00000158696 | 1.16        | 0.013333333 | -6.442943496 | 2.94E-06    | 0.000144153 | yes | mhc1zda            |
| ENSDART00000160090 | 41.98666667 | 19.04666667 | -1.140392721 | 0.021821393 | 0.189270278 | no  | BX901923.2         |
| ENSDART00000160098 | 2.426666667 | 0.076666667 | -4.984232684 | 2.35E-06    | 0.000119742 | yes | BX901923.2         |
| ENSDART00000161094 | 0.596666667 | 0.001       | -9.220781371 | 0.036403395 | 0.265334294 | no  | BX640547.1         |
| ENSDART00000161509 | 2.44        | 0.516666667 | -2.239575433 | 0.049673297 | 0.328651649 | no  | BX936433.1         |
| ENSDART00000161583 | 0.266666667 | 0.94        | 1.817623258  | 1.67E-11    | 2.55E-09    | yes | FP102783.1         |
| ENSDART00000161755 | 7.676666667 | 2.836666667 | -1.436283374 | 0.033611428 | 0.253811668 | no  | CU681842.1         |
| ENSDART00000162136 | 1.203333333 | 0.083333333 | -3.851998837 | 0.01902035  | 0.176028966 | no  | FP016106.1         |
| ENSDART00000162258 | 6.85        | 2.373333333 | -1.529189248 | 0.011818739 | 0.128922316 | no  | BX901957.1         |
| ENSDART00000162659 | 0.353333333 | 0.943333333 | 1.416737788  | 0.046696751 | 0.31526617  | no  | CU856423.1         |
| ENSDART00000163057 | 9.71        | 3.503333333 | -1.470743032 | 0.00169063  | 0.029125473 | yes | FP101882.1         |
| ENSDART00000163410 | 11.26333333 | 4.06        | -1.472082217 | 0.009359492 | 0.109566911 | no  | CU468917.1         |
| ENSDART00000163592 | 0.001       | 0.153333333 | 7.26052755   | 0.017491295 | 0.170564923 | no  | AL645792.2         |
| ENSDART00000164487 | 0.01        | 0.123333333 | 3.624490865  | 0.047291609 | 0.318421669 | no  | FP565451.1         |
| ENSDART00000164681 | 0.001       | 0.223333333 | 7.803054785  | 0.043490117 | 0.299279098 | no  | FP016142.2         |
| ENSDART00000167160 | 1.236666667 | 0.283333333 | -2.12588444  | 0.011072194 | 0.122925953 | no  | BX927122.1         |
| ENSDART00000168210 | 3.493333333 | 1.533333333 | -1.187932951 | 0.03281669  | 0.2514604   | no  | FP016106.1         |
| ENSDART00000169453 | 4.34        | 13.86       | 1.67516031   | 1.72E-12    | 3.07E-10    | yes | CU469577.1         |
| ENSDART00000172265 | 1.713333333 | 0.313333333 | -2.451035698 | 0.007098564 | 0.09187675  | no  | CU639397.1         |
| ENSDART00000172918 | 0.246666667 | 0.733333333 | 1.571906348  | 0.017083556 | 0.168010717 | no  | BX005228.1         |
| ENSDART00000173479 | 0.946666667 | 2.213333333 | 1.225292312  | 1.07E-06    | 5.69E-05    | yes | CR388231.2         |
| ENSDART00000173489 | 2.43        | 0.52        | -2.224372785 | 0.044536144 | 0.304798047 | no  | BX957297.2         |
| ENSDART00000173632 | 0.001       | 0.576666667 | 9.171593822  | 0.001516692 | 0.026310396 | yes | FO704741.1         |
| ENSDART00000173718 | 13.90666667 | 5.64        | -1.302009589 | 0.015166069 | 0.15590469  | no  | CR388099.1         |
| ENSDART00000174069 | 12.06666667 | 1.13        | -3.416632519 | 3.35E-17    | 2.09E-14    | yes | CABZ010158<br>15.1 |
| ENSDART00000174163 | 0.283333333 | 1.373333333 | 2.277109591  | 0.00044915  | 0.010107892 | yes | CABZ010682<br>73.1 |
| ENSDART00000174365 | 101.8566667 | 38.23333333 | -1.413637519 | 0.009616603 | 0.110193915 | no  | CABZ010705         |

|                    |             |             |              |             |             |     |            |
|--------------------|-------------|-------------|--------------|-------------|-------------|-----|------------|
|                    |             |             |              |             |             |     | 27.1       |
|                    |             |             |              |             |             |     | CABZ010705 |
| ENSDART00000174374 | 69.12666667 | 28.21666667 | -1.292694792 | 0.041414474 | 0.290775041 | no  | 27.1       |
| ENSDART00000174415 | 14.76333333 | 4.23        | -1.803288928 | 0.000305981 | 0.007493538 | yes | CR376839.1 |
| ENSDART00000174417 | 0.02        | 0.303333333 | 3.922832139  | 0.003138419 | 0.047803479 | yes | AL928927.2 |
| ENSDART00000174479 | 0.11        | 0.32        | 1.540568381  | 0.005009304 | 0.069560803 | no  | CABZ010771 |
| ENSDART00000174664 | 0.001       | 0.11        | 6.781359714  | 0.00470034  | 0.067093997 | no  | 24.2       |
| ENSDART00000174725 | 0.001       | 0.146666667 | 7.196397213  | 0.016293899 | 0.163500813 | no  | FO704589.1 |
| ENSDART00000174729 | 4.17        | 1.37        | -1.60587149  | 0.023957647 | 0.20286848  | no  | CABZ010841 |
| ENSDART00000174739 | 0.586666667 | 0.106666667 | -2.459431619 | 0.026500794 | 0.217045843 | no  | 34.1       |
| ENSDART00000174837 | 0.723333333 | 0.001       | -9.498516827 | 0.019907539 | 0.178881409 | no  | BX255935.2 |
| ENSDART00000174873 | 0.756666667 | 0.19        | -1.993658473 | 0.004258894 | 0.061853012 | no  | CABZ010023 |
| ENSDART00000174913 | 0.236666667 | 0.001       | -7.886712714 | 0.041884117 | 0.291836878 | no  | 39.2       |
| ENSDART00000174956 | 8.856666667 | 2.693333333 | -1.71737103  | 0.000248829 | 0.006342609 | yes | CABZ010128 |
| ENSDART00000174983 | 5.653333333 | 1.163333333 | -2.280837228 | 1.09E-05    | 0.000462391 | yes | 66.1       |
| ENSDART00000174990 | 0.146666667 | 0.35        | 1.254813899  | 0.026117976 | 0.214614162 | no  | CABZ010049 |
| ENSDART00000175018 | 0.233333333 | 0.65        | 1.478047297  | 0.000223294 | 0.0058103   | yes | 03.1       |
| ENSDART00000175059 | 3.99        | 0.62        | -2.686048626 | 7.35E-10    | 7.34E-08    | yes | CABZ010880 |
| ENSDART00000175077 | 0.001       | 0.413333333 | 8.691161905  | 0.000602256 | 0.012844017 | yes | 53.1       |
| ENSDART00000175105 | 1.093333333 | 0.376666667 | -1.537373042 | 0.023795966 | 0.202663252 | no  | BX927329.2 |
| ENSDART00000175123 | 0.22        | 0.001       | -7.781359714 | 0.025613639 | 0.211587856 | no  | CABZ010771 |
| ENSDART00000175130 | 0.373333333 | 0.043333333 | -3.106915204 | 0.016639123 | 0.165544368 | no  | 21.1       |
| ENSDART00000175143 | 1.353333333 | 0.313333333 | -2.110747066 | 0.020253237 | 0.180687807 | no  | CABZ010489 |
| ENSDART00000175228 | 1.063333333 | 0.13        | -3.032010395 | 0.022124602 | 0.189921837 | no  | 56.2       |
| ENSDART00000175255 | 2.8         | 7.543333333 | 1.429775352  | 1.79E-10    | 2.03E-08    | yes | CABZ010071 |
| ENSDART00000175370 | 0.001       | 0.413333333 | 8.691161905  | 0.001058158 | 0.019542647 | yes | 02.1       |
| ENSDART00000175382 | 1.84        | 0.336666667 | -2.450312974 | 0.015989548 | 0.163028125 | no  | BX571711.3 |
| ENSDART00000175391 | 0.61        | 0.143333333 | -2.089435084 | 0.034185528 | 0.255675    | no  | CABZ010798 |
| ENSDART00000175448 | 8.04        | 2.526666667 | -1.669960154 | 0.000137417 | 0.003856929 | yes | 94.1       |
|                    |             |             |              |             |             |     | CR450695.1 |
|                    |             |             |              |             |             |     | CR925768.3 |
|                    |             |             |              |             |             |     | CABZ010594 |
|                    |             |             |              |             |             |     | 13.1       |
|                    |             |             |              |             |             |     | BX649411.3 |
|                    |             |             |              |             |             |     | CU462979.1 |
|                    |             |             |              |             |             |     | CABZ010889 |
|                    |             |             |              |             |             |     | 16.1       |
|                    |             |             |              |             |             |     | FO834828.1 |
|                    |             |             |              |             |             |     | CABZ010831 |
|                    |             |             |              |             |             |     | 02.1       |
|                    |             |             |              |             |             |     | CR846087.5 |
|                    |             |             |              |             |             |     | CABZ010683 |
|                    |             |             |              |             |             |     | 58.1       |

|                    |             |             |              |             |             |     |                    |
|--------------------|-------------|-------------|--------------|-------------|-------------|-----|--------------------|
| ENSDART00000175465 | 0.06        | 0.323333333 | 2.429987841  | 0.009675209 | 0.110359234 | no  | zgc:194629         |
| ENSDART00000175535 | 0.426666667 | 1.256666667 | 1.558420713  | 0.004996261 | 0.069560803 | no  | CR388179.1         |
| ENSDART00000175572 | 3.84        | 0.806666667 | -2.251061764 | 0.000102177 | 0.002900437 | yes | CABZ010594<br>17.3 |
| ENSDART00000175591 | 0.366666667 | 0.001       | -8.518325308 | 0.000796711 | 0.015550785 | yes | CABZ010873<br>88.1 |
| ENSDART00000175595 | 5.363333333 | 1.896666667 | -1.499663768 | 0.016792118 | 0.165797275 | no  | CABZ010798<br>73.1 |
| ENSDART00000175603 | 0.11        | 0.37        | 1.750021747  | 0.000789296 | 0.015550785 | yes | CR792418.4         |
| ENSDART00000175628 | 7.796666667 | 0.8         | -3.284785551 | 6.72E-07    | 3.81E-05    | yes | BX000486.1         |
| ENSDART00000175679 | 0.02        | 0.406666667 | 4.345774837  | 0.000673047 | 0.013780918 | yes | CABZ010728<br>45.1 |
| ENSDART00000175691 | 0.096666667 | 0.693333333 | 2.842458723  | 4.80E-05    | 0.001640181 | yes | CR384075.1         |
| ENSDART00000175748 | 0.143333333 | 0.316666667 | 1.143590854  | 0.01119432  | 0.123731911 | no  | fancb              |
| ENSDART00000175796 | 7.296666667 | 2.106666667 | -1.792275491 | 8.72E-05    | 0.002622904 | yes | CR762475.6         |
| ENSDART00000175857 | 2.903333333 | 0.763333333 | -1.927325121 | 0.018054999 | 0.171649203 | no  | BX323033.1         |
| ENSDART00000175867 | 1.816666667 | 4.263333333 | 1.230688129  | 3.58E-10    | 3.89E-08    | yes | CABZ010802<br>24.1 |
| ENSDART00000175900 | 0.433333333 | 0.001       | -8.759333407 | 0.013115805 | 0.140614937 | no  | FO681360.2         |
| ENSDART00000176026 | 0.15        | 0.001       | -7.22881869  | 0.003333977 | 0.050474392 | no  | CABZ010440<br>23.1 |
| ENSDART00000176028 | 0.143333333 | 0.001       | -7.163230349 | 0.044989232 | 0.306220987 | no  | BX927125.2         |
| ENSDART00000176063 | 0.393333333 | 0.001       | -8.619608644 | 0.047939537 | 0.320195091 | no  | BX901894.1         |
| ENSDART00000176131 | 0.613333333 | 0.083333333 | -2.879705766 | 0.021944403 | 0.18967861  | no  | CR735107.3         |
| ENSDART00000176191 | 4.883333333 | 1.696666667 | -1.525163103 | 0.013063665 | 0.140614937 | no  | CABZ010614<br>78.1 |
| ENSDART00000176229 | 1.14        | 0.001       | -10.15481811 | 9.77E-07    | 5.30E-05    | yes | FO818685.1         |
| ENSDART00000176238 | 0.001       | 0.336666667 | 8.395177077  | 0.031293534 | 0.243602266 | no  | CABZ010566<br>28.2 |
| ENSDART00000176275 | 6.193333333 | 36.24333333 | 2.548927647  | 5.22E-19    | 4.35E-16    | yes | BX000486.1         |
| ENSDART00000176352 | 72.98333333 | 25.60333333 | -1.511235395 | 0.002200948 | 0.036653114 | yes | CT867953.1         |
| ENSDART00000176355 | 1.966666667 | 5.143333333 | 1.386951202  | 6.87E-09    | 5.92E-07    | yes | CABZ010394<br>24.2 |
| ENSDART00000176540 | 0.366666667 | 0.001       | -8.518325308 | 0.00942484  | 0.109566911 | no  | CABZ010908<br>18.1 |
| ENSDART00000176616 | 5.683333333 | 0.786666667 | -2.852912975 | 8.70E-05    | 0.002622904 | yes | CR293509.4         |
| ENSDART00000176635 | 5.153333333 | 1.77        | -1.541756553 | 0.002500772 | 0.040564463 | yes | CABZ011183<br>17.1 |
| ENSDART00000176661 | 0.406666667 | 0.001       | -8.667702932 | 7.18E-09    | 5.98E-07    | yes | FO704848.1         |
| ENSDART00000176677 | 0.256666667 | 0.733333333 | 1.514573173  | 0.025432776 | 0.211066689 | no  | CU138506.3         |
| ENSDART00000176682 | 0.116666667 | 0.001       | -6.866248611 | 0.035018065 | 0.260856779 | no  | CABZ010594<br>17.3 |
| ENSDART00000176730 | 0.001       | 1.146666667 | 10.16323035  | 9.99E-11    | 1.25E-08    | yes | CABZ010789         |

|                    |             |             |              |             |                 |            |
|--------------------|-------------|-------------|--------------|-------------|-----------------|------------|
|                    |             |             |              |             |                 | 89.1       |
| ENSDART00000176871 | 18.04       | 4.32        | -2.062096121 | 9.66E-08    | 6.35E-06 yes    | CABZ010300 |
|                    |             |             |              |             |                 | 33.1       |
| ENSDART00000176956 | 0.183333333 | 0.001       | -7.518325308 | 0.030995033 | 0.243598281 no  | CABZ010566 |
|                    |             |             |              |             |                 | 28.1       |
| ENSDART00000177055 | 0.48        | 0.046666667 | -3.362570079 | 0.000429579 | 0.010028866 yes | CABZ010631 |
|                    |             |             |              |             |                 | 70.1       |
| ENSDART00000177071 | 6.44        | 2.63        | -1.291997889 | 0.020005149 | 0.179114201 no  | CABZ010735 |
|                    |             |             |              |             |                 | 46.1       |
| ENSDART00000177136 | 0.001       | 0.113333333 | 6.824428435  | 0.00554817  | 0.075322436 no  | CABZ010351 |
|                    |             |             |              |             |                 | 91.4       |
| ENSDART00000177239 | 2.253333333 | 0.293333333 | -2.941447818 | 0.007041105 | 0.09187675 no   | BX470140.1 |
| ENSDART00000177366 | 3.873333333 | 0.973333333 | -1.992569795 | 4.72E-05    | 0.001638686 yes | CR925768.4 |
| ENSDART00000177369 | 2.183333333 | 0.076666667 | -4.83178914  | 1.08E-07    | 6.91E-06 yes    | CABZ010594 |
|                    |             |             |              |             |                 | 17.3       |
| ENSDART00000177544 | 15.63       | 1.736666667 | -3.169925001 | 3.15E-07    | 1.83E-05 yes    | CABZ010880 |
|                    |             |             |              |             |                 | 53.1       |
| ENSDART00000177561 | 0.15        | 0.326666667 | 1.122856748  | 0.018573562 | 0.174413873 no  | BX640537.3 |
| ENSDART00000177591 | 0.283333333 | 0.001       | -8.14635653  | 0.035620482 | 0.262477771 no  | CR790382.4 |
| ENSDART00000177595 | 1.353333333 | 2.79        | 1.043747895  | 0.02385228  | 0.202663252 no  | BX470214.1 |
| ENSDART00000177599 | 1.25        | 0.226666667 | -2.463283944 | 0.033105491 | 0.252724331 no  | AL772298.4 |
| ENSDART00000177676 | 1.776666667 | 0.413333333 | -2.103795412 | 0.048319914 | 0.321875052 no  | BX465848.6 |
| ENSDART00000177724 | 0.176666667 | 0.47        | 1.411630898  | 0.002976095 | 0.046175686 yes | BX323984.1 |
| ENSDART00000177745 | 1.16        | 0.42        | -1.465663572 | 0.036433012 | 0.265334294 no  | AL935044.5 |
| ENSDART00000177749 | 5.816666667 | 1.49        | -1.9648803   | 4.29E-06    | 0.00020618 yes  | FO704848.1 |
| ENSDART00000177793 | 0.023333333 | 0.28        | 3.584962501  | 0.008269854 | 0.10028202 no   | CU855942.1 |
| ENSDART00000177848 | 15.21333333 | 6.596666667 | -1.205527179 | 0.017616393 | 0.170564923 no  | CABZ010664 |
|                    |             |             |              |             |                 | 34.1       |
| ENSDART00000177891 | 1.036666667 | 0.306666667 | -1.757208814 | 0.017928623 | 0.171592723 no  | FO393393.1 |
| ENSDART00000177901 | 0.001       | 0.176666667 | 7.464886049  | 0.007392695 | 0.09359646 no   | CABZ010141 |
|                    |             |             |              |             |                 | 97.1       |
| ENSDART00000177950 | 0.96        | 0.001       | -9.906890596 | 2.77E-15    | 1.15E-12 yes    | BX640547.7 |
| ENSDART00000178030 | 0.78        | 0.166666667 | -2.22650853  | 0.040599476 | 0.288117875 no  | CABZ010873 |
|                    |             |             |              |             |                 | 88.1       |
| ENSDART00000178064 | 1.603333333 | 3.363333333 | 1.068817375  | 0.000449082 | 0.010107892 yes | AL954146.3 |
| ENSDART00000178146 | 0.026666667 | 0.77        | 4.851749041  | 0.002779251 | 0.043940317 yes | CABZ010690 |
|                    |             |             |              |             |                 | 95.1       |
| ENSDART00000178200 | 0.276666667 | 0.713333333 | 1.366427555  | 0.000372851 | 0.00887031 yes  | FO704589.1 |
| ENSDART00000178266 | 9.236666667 | 3.546666667 | -1.38090856  | 0.035087221 | 0.260856779 no  | FO704882.1 |
| ENSDART00000178293 | 2.216666667 | 0.82        | -1.434696025 | 0.043009115 | 0.296985487 no  | BX664605.3 |
| ENSDART00000178307 | 0.87        | 0.213333333 | -2.027905997 | 0.013944158 | 0.145742702 no  | CU467943.2 |
| ENSDART00000178318 | 0.69        | 0.193333333 | -1.835505962 | 0.008137141 | 0.099154045 no  | CR751608.2 |
| ENSDART00000178421 | 0.326666667 | 0.85        | 1.379643593  | 0.000915162 | 0.01731874 yes  | BX936391.3 |

|                    |             |             |              |             |                 |                    |
|--------------------|-------------|-------------|--------------|-------------|-----------------|--------------------|
| ENSDART00000178435 | 0.406666667 | 1.12        | 1.461580085  | 1.41E-07    | 8.61E-06 yes    | CABZ010554<br>08.1 |
| ENSDART00000178438 | 0.523333333 | 0.02        | -4.709658248 | 0.000786611 | 0.015550785 yes | BX957317.3         |
| ENSDART00000178472 | 0.001       | 0.06        | 5.906890596  | 0.017865719 | 0.171592723 no  | CU019646.1         |
| ENSDART00000178534 | 0.876666667 | 0.226666667 | -1.951456148 | 0.00994857  | 0.112450356 no  | CABZ010676<br>57.1 |
| ENSDART00000178572 | 0.001       | 0.053333333 | 5.736965594  | 0.019762668 | 0.178220741 no  | CU570781.2         |
| ENSDART00000178577 | 1.22        | 4.823333333 | 1.983149368  | 3.98E-12    | 6.63E-10 yes    | CABZ010728<br>48.1 |
| ENSDART00000178589 | 0.15        | 0.636666667 | 2.085575732  | 0.005667827 | 0.076119525 no  | CU693368.2         |
| ENSDART00000178656 | 15.41333333 | 33.15       | 1.104829973  | 5.26E-11    | 6.92E-09 yes    | CABZ010802<br>24.1 |
| ENSDART00000178670 | 0.466666667 | 1.68        | 1.847996907  | 4.32E-11    | 5.99E-09 yes    | BX936391.2         |
| ENSDART00000178748 | 0.36        | 0.001       | -8.491853096 | 0.013440489 | 0.142594987 no  | CABZ010400<br>21.1 |
| ENSDART00000178805 | 1.146666667 | 0.116666667 | -3.296981738 | 0.003017828 | 0.046534164 yes | BX936448.1         |
| ENSDART00000178999 | 0.05        | 0.001       | -5.64385619  | 0.024312623 | 0.204487985 no  | CABZ010720<br>77.1 |
| ENSDART00000179136 | 0.001       | 0.25        | 7.965784285  | 0.027418587 | 0.220940742 no  | CT573169.1         |
| ENSDART00000179172 | 0.153333333 | 0.42        | 1.453717967  | 0.018712137 | 0.174413873 no  | BX897682.2         |
| ENSDART00000179265 | 5.463333333 | 1.83        | -1.5779378   | 0.013345085 | 0.142461636 no  | CABZ010637<br>90.1 |
| ENSDART00000179273 | 2.536666667 | 0.716666667 | -1.823559794 | 0.009452875 | 0.109566911 no  | BX649411.5         |
| ENSDART00000179278 | 0.096666667 | 0.001       | -6.594946589 | 0.019096817 | 0.176028966 no  | CU570781.2         |
| ENSDART00000179287 | 9.41        | 1.753333333 | -2.424094424 | 2.97E-08    | 2.06E-06 yes    | CR790382.5         |
| ENSDART00000179301 | 0.001       | 0.266666667 | 8.058893689  | 0.003116893 | 0.047766861 yes | FP102311.1         |
| ENSDART00000179304 | 0.203333333 | 0.001       | -7.667702932 | 0.024817211 | 0.207335765 no  | CR925768.4         |
| ENSDART00000179343 | 0.856666667 | 0.093333333 | -3.198269627 | 0.009746515 | 0.110667246 no  | BX255935.4         |
| ENSDART00000179424 | 9.953333333 | 3.276666667 | -1.602950844 | 0.017744023 | 0.171137338 no  | FO818732.1         |
| ENSDART00000179466 | 0.383333333 | 0.913333333 | 1.252542032  | 0.032138001 | 0.24854714 no   | BX005154.1         |
| ENSDART00000179497 | 0.001       | 0.356666667 | 8.478432581  | 0.043037929 | 0.296985487 no  | CR361542.3         |
| ENSDART00000179576 | 2.4         | 0.76        | -1.658963082 | 0.001063971 | 0.019542647 yes | BX296567.2         |
| ENSDART00000179623 | 70.75666667 | 29.35333333 | -1.269341741 | 0.00750824  | 0.094249162 no  | CABZ010722<br>55.2 |
| ENSDART00000179638 | 1.973333333 | 0.46        | -2.100928909 | 0.00089404  | 0.017060221 yes | CABZ010671<br>70.1 |
| TCONS_00000016     | 2.43        | 0.816666667 | -1.573137065 | 0.004396878 | 0.063487867 no  | -                  |
| TCONS_00001351     | 5.833333333 | 1.226666667 | -2.249577251 | 0.000100695 | 0.00289123 yes  | -                  |
| TCONS_00001517     | 2.356666667 | 0.336666667 | -2.807354922 | 0.000738359 | 0.014995293 yes | -                  |
| TCONS_00005787     | 1.716666667 | 0.486666667 | -1.818604063 | 0.016254754 | 0.163500813 no  | -                  |
| TCONS_00006052     | 0.001       | 0.1         | 6.64385619   | 0.018698851 | 0.174413873 no  | -                  |
| TCONS_00006313     | 3.736666667 | 1.416666667 | -1.399251532 | 0.033906841 | 0.255079175 no  | -                  |
| TCONS_00006524     | 1.276666667 | 0.396666667 | -1.686382819 | 0.026788072 | 0.2172617 no    | -                  |

|                |             |             |              |             |             |     |   |
|----------------|-------------|-------------|--------------|-------------|-------------|-----|---|
| TCONS_00006542 | 0.64        | 1.476666667 | 1.206200388  | 9.26E-05    | 0.002727767 | yes | - |
| TCONS_00008030 | 1.386666667 | 0.073333333 | -4.2410081   | 0.008341812 | 0.100665928 | no  | - |
| TCONS_00008197 | 0.113333333 | 0.51        | 2.169925001  | 0.03363157  | 0.253811668 | no  | - |
| TCONS_00010602 | 0.633333333 | 0.18        | -1.814968106 | 0.006762757 | 0.088912454 | no  | - |
| TCONS_00010870 | 3.64        | 7.37        | 1.017726169  | 1.22E-07    | 7.62E-06    | yes | - |
| TCONS_00011728 | 0.84        | 0.053333333 | -3.977279923 | 0.000165623 | 0.00449702  | yes | - |
| TCONS_00014589 | 0.03        | 3.26        | 6.763765654  | 1.98E-44    | 4.95E-41    | yes | - |
| TCONS_00014742 | 0.001       | 0.31        | 8.276124405  | 0.021294357 | 0.185611161 | no  | - |
| TCONS_00015168 | 0.416666667 | 0.02        | -4.380821784 | 0.013675505 | 0.143535344 | no  | - |
| TCONS_00017420 | 3.393333333 | 1.086666667 | -1.642793692 | 0.00225564  | 0.037315152 | yes | - |
| TCONS_00017671 | 5.026666667 | 1.51        | -1.735053473 | 0.003524927 | 0.052412302 | no  | - |
| TCONS_00018049 | 5.496666667 | 1.07        | -2.360946196 | 0.016700233 | 0.165544368 | no  | - |
| TCONS_00018255 | 0.66        | 0.043333333 | -3.928916902 | 0.011351648 | 0.124918133 | no  | - |
| TCONS_00018578 | 1.983333333 | 0.001       | -10.95371145 | 1.73E-11    | 2.55E-09    | yes | - |
| TCONS_00019790 | 1.336666667 | 0.353333333 | -1.919537972 | 0.035387419 | 0.261821283 | no  | - |
| TCONS_00021840 | 0.513333333 | 0.026666667 | -4.266786541 | 0.0173727   | 0.170184331 | no  | - |
| TCONS_00022620 | 0.386666667 | 0.033333333 | -3.5360529   | 0.030063083 | 0.239164273 | no  | - |
| TCONS_00024839 | 3.336666667 | 1.03        | -1.695763231 | 0.008511372 | 0.101244796 | no  | - |
| TCONS_00025683 | 4175.546667 | 1263.93     | -1.724048524 | 1.01E-05    | 0.000436832 | yes | - |
| TCONS_00025684 | 58.24333333 | 20.07       | -1.537052308 | 0.008686903 | 0.102843056 | no  | - |
| TCONS_00026099 | 1.07        | 0.08        | -3.741466986 | 0.004136869 | 0.060432158 | no  | - |
| TCONS_00027070 | 0.506666667 | 0.001       | -8.984893108 | 0.00519067  | 0.071243374 | no  | - |
| TCONS_00027601 | 0.556666667 | 1.156666667 | 1.05508756   | 0.000585984 | 0.012618865 | yes | - |
| TCONS_00027838 | 0.216666667 | 1.72        | 2.988859442  | 0.001355331 | 0.024182969 | yes | - |
| TCONS_00029335 | 4.87        | 0.47        | -3.37318911  | 3.62E-13    | 8.22E-11    | yes | - |
| TCONS_00029336 | 2.706666667 | 0.383333333 | -2.819845866 | 9.66E-09    | 7.54E-07    | yes | - |
| TCONS_00029966 | 0.12        | 2.143333333 | 4.158749926  | 1.42E-15    | 7.09E-13    | yes | - |
| TCONS_00030055 | 0.916666667 | 0.12        | -2.933362807 | 0.026751351 | 0.2172617   | no  | - |
| TCONS_00030057 | 6.786666667 | 1.88        | -1.851970494 | 5.44E-05    | 0.001765394 | yes | - |
| TCONS_00030110 | 5.41        | 1.786666667 | -1.598358094 | 0.009525048 | 0.109647782 | no  | - |
| TCONS_00036349 | 0.026666667 | 0.29        | 3.442943496  | 0.012962952 | 0.140179452 | no  | - |
| TCONS_00036351 | 0.21        | 0.67        | 1.673771768  | 0.003500593 | 0.05236217  | no  | - |
| TCONS_00037421 | 14.10666667 | 2.29        | -2.622957623 | 1.66E-12    | 3.07E-10    | yes | - |
| TCONS_00038949 | 0.756666667 | 0.001       | -9.563514081 | 0.02514942  | 0.209410841 | no  | - |
| TCONS_00039155 | 13.82666667 | 3.356666667 | -2.042352211 | 9.67E-05    | 0.002809922 | yes | - |
| TCONS_00039837 | 0.41        | 3.616666667 | 3.140964822  | 4.93E-09    | 4.56E-07    | yes | - |
| TCONS_00040852 | 0.03        | 0.4         | 3.736965594  | 0.022042815 | 0.189872252 | no  | - |
| TCONS_00041256 | 2.936666667 | 0.453333333 | -2.695535368 | 0.000201461 | 0.005297356 | yes | - |
| TCONS_00041817 | 0.833333333 | 0.296666667 | -1.490050854 | 0.049500943 | 0.328651649 | no  | - |
| TCONS_00042166 | 0.053333333 | 0.376666667 | 2.820178962  | 0.010960144 | 0.122225183 | no  | - |
| TCONS_00042602 | 0.613333333 | 0.001       | -9.26052755  | 0.004945414 | 0.069560803 | no  | - |
| TCONS_00044410 | 0.51        | 0.001       | -8.994353437 | 0.024784056 | 0.207335765 | no  | - |

|                |             |             |              |             |             |     |   |
|----------------|-------------|-------------|--------------|-------------|-------------|-----|---|
| TCONS_00044430 | 1.393333333 | 0.106666667 | -3.707359132 | 0.013499548 | 0.142594987 | no  | - |
| TCONS_00044431 | 1.176666667 | 0.03        | -5.293599372 | 0.000324288 | 0.007864775 | yes | - |
| TCONS_00044494 | 4.95        | 1.14        | -2.118394701 | 4.62E-05    | 0.00162541  | yes | - |
| TCONS_00045363 | 4.91        | 2.163333333 | -1.182467047 | 0.020615958 | 0.181333323 | no  | - |
| TCONS_00045712 | 0.07        | 0.596666667 | 3.091498354  | 0.002423931 | 0.039575032 | yes | - |
| TCONS_00046249 | 4.573333333 | 1.846666667 | -1.3083226   | 0.019740914 | 0.178220741 | no  | - |
| TCONS_00046349 | 0.46        | 0.013333333 | -5.108524457 | 0.000477638 | 0.010653036 | yes | - |
| TCONS_00046442 | 0.716666667 | 0.163333333 | -2.133483005 | 0.039356283 | 0.281696259 | no  | - |
| TCONS_00046772 | 1.24        | 0.363333333 | -1.770974486 | 0.00133635  | 0.024015838 | yes | - |
| TCONS_00046866 | 0.446666667 | 0.001       | -8.803054785 | 0.020529067 | 0.181207104 | no  | - |
| TCONS_00046887 | 1.173333333 | 0.493333333 | -1.249978253 | 0.033183979 | 0.252724331 | no  | - |
| TCONS_00048649 | 0.29        | 0.023333333 | -3.635588574 | 0.000933516 | 0.017533258 | yes | - |
| TCONS_00049550 | 0.393333333 | 0.83        | 1.077358883  | 0.001280035 | 0.023170496 | yes | - |
| TCONS_00050633 | 5.37        | 17.47       | 1.701885615  | 1.51E-20    | 1.89E-17    | yes | - |
| TCONS_00050783 | 1.176666667 | 0.163333333 | -2.848814529 | 0.007149388 | 0.092057583 | no  | - |
| TCONS_00051764 | 27.71666667 | 5.496666667 | -2.334124865 | 0.001206742 | 0.022003225 | yes | - |
| TCONS_00052313 | 4.476666667 | 0.001       | -12.12820918 | 0.00014146  | 0.003926299 | yes | - |
| TCONS_00052484 | 3.693333333 | 0.796666667 | -2.212875358 | 0.000377872 | 0.008904943 | yes | - |
| TCONS_00052585 | 0.486666667 | 0.001       | -8.926790153 | 0.0006594   | 0.013726508 | yes | - |
| TCONS_00053093 | 0.233333333 | 0.69        | 1.564203941  | 0.0205284   | 0.181207104 | no  | - |
| TCONS_00053305 | 0.606666667 | 0.096666667 | -2.649813645 | 0.018071954 | 0.171649203 | no  | - |
| TCONS_00054110 | 0.5         | 1.653333333 | 1.72537762   | 0.003456173 | 0.05200915  | no  | - |
| TCONS_00054345 | 0.056666667 | 0.193333333 | 1.770518154  | 0.007625229 | 0.095239107 | no  | - |
| TCONS_00054435 | 1.193333333 | 0.3         | -1.991962681 | 0.004563452 | 0.065514386 | no  | - |
| TCONS_00054852 | 0.56        | 0.033333333 | -4.070389328 | 0.019091316 | 0.176028966 | no  | - |
| TCONS_00054942 | 0.006666667 | 0.533333333 | 6.321928095  | 1.08E-14    | 3.00E-12    | yes | - |
| TCONS_00056892 | 4.196666667 | 10.36666667 | 1.304636297  | 3.98E-14    | 9.95E-12    | yes | - |
| TCONS_00057087 | 4.743333333 | 0.996666667 | -2.250718272 | 2.60E-08    | 1.85E-06    | yes | - |
| TCONS_00057118 | 2.21        | 0.486666667 | -2.183040501 | 0.00947416  | 0.109566911 | no  | - |
| TCONS_00057290 | 1.073333333 | 0.4         | -1.424026283 | 0.02566498  | 0.211587856 | no  | - |
| TCONS_00057439 | 3.286666667 | 1.263333333 | -1.379389798 | 0.047423799 | 0.31845336  | no  | - |
| TCONS_00058673 | 9.953333333 | 2.22        | -2.164620083 | 2.41E-05    | 0.000940244 | yes | - |
| TCONS_00058674 | 13.83       | 3.583333333 | -1.948426997 | 0.000437402 | 0.010107892 | yes | - |
| TCONS_00059403 | 0.99        | 0.001       | -9.951284715 | 0.000183454 | 0.004927621 | yes | - |
| TCONS_00059536 | 4.943333333 | 1.656666667 | -1.577200841 | 0.0002352   | 0.006057018 | yes | - |
| TCONS_00060060 | 1.6         | 3.35        | 1.06608919   | 1.78E-08    | 1.35E-06    | yes | - |
| TCONS_00060162 | 0.68        | 0.04        | -4.087462841 | 0.00255387  | 0.041158504 | yes | - |
| TCONS_00060266 | 0.486666667 | 1.633333333 | 1.74681338   | 2.03E-08    | 1.49E-06    | yes | - |
| TCONS_00061187 | 0.596666667 | 0.126666667 | -2.235888264 | 0.03101051  | 0.243598281 | no  | - |
| TCONS_00062201 | 0.001       | 0.406666667 | 8.667702932  | 0.01461144  | 0.152080741 | no  | - |
| TCONS_00062691 | 0.466666667 | 0.001       | -8.866248611 | 0.030560392 | 0.24158183  | no  | - |
| TCONS_00063727 | 1.323333333 | 0.286666667 | -2.206730442 | 6.19E-05    | 0.001956227 | yes | - |



|                |             |             |              |             |             |     |   |
|----------------|-------------|-------------|--------------|-------------|-------------|-----|---|
| TCONS_00064933 | 0.41        | 0.001       | -8.6794801   | 0.010492697 | 0.118066476 | no  | - |
| TCONS_00067059 | 0.001       | 0.476666667 | 8.896836931  | 0.005030885 | 0.069560803 | no  | - |
| TCONS_00067545 | 0.163333333 | 0.676666667 | 2.050626073  | 0.00026755  | 0.006750906 | yes | - |
| TCONS_00067559 | 1.226666667 | 0.47        | -1.384010604 | 0.042995162 | 0.296985487 | no  | - |
| TCONS_00069725 | 0.001       | 0.45        | 8.813781191  | 2.03E-05    | 0.000804886 | yes | - |
| TCONS_00070223 | 1.766666667 | 0.35        | -2.335603032 | 5.68E-05    | 0.001818991 | yes | - |
| TCONS_00071196 | 0.556666667 | 0.12        | -2.213779291 | 0.031385547 | 0.243602266 | no  | - |
| TCONS_00075414 | 0.406666667 | 0.046666667 | -3.123382416 | 0.020326479 | 0.180695886 | no  | - |

---

Table S2

| GeneID             | CK0dpa_fpkm | T7dpa_fpkm  | log2(FC)     | Pvalue      | FDR         | significant | Symbol         |
|--------------------|-------------|-------------|--------------|-------------|-------------|-------------|----------------|
| ENSDART00000007434 | 6.01        | 1.76        | -1.771789562 | 1.25E-07    | 3.08E-05    | yes         | BX005421.1     |
| ENSDART00000087449 | 0.096666667 | 0.696666667 | 2.849378137  | 4.37E-07    | 8.32E-05    | yes         | CR847968.1     |
| ENSDART00000137680 | 0.023333333 | 0.41        | 4.135159583  | 0.000394765 | 0.02692079  | yes         | BX663503.1     |
| ENSDART00000139663 | 0.443333333 | 1.67        | 1.913384358  | 0.012833577 | 0.305887694 | no          | CR391910.2     |
| ENSDART00000140464 | 0.04        | 0.273333333 | 2.772589504  | 0.018646312 | 0.346523308 | no          | CR751602.1     |
| ENSDART00000141092 | 5.733333333 | 1.773333333 | -1.692910414 | 0.000102605 | 0.009329414 | yes         | BX469930.1     |
| ENSDART00000144687 | 6.893333333 | 1.713333333 | -2.008395921 | 3.52E-05    | 0.004318545 | yes         | CABZ01015815.1 |
| ENSDART00000145771 | 3.116666667 | 1.25        | -1.318075769 | 0.014901787 | 0.318120759 | no          | CT573344.1     |
| ENSDART00000150088 | 0.07        | 1.226666667 | 4.131244533  | 0.000309718 | 0.02172448  | yes         | BX649485.2     |
| ENSDART00000152652 | 0.363333333 | 0.026666667 | -3.768184325 | 0.047962787 | 0.59770884  | no          | CT033796.2     |
| ENSDART00000153176 | 1.573333333 | 0.593333333 | -1.406909618 | 0.038770091 | 0.52585952  | no          | CR749163.1     |
| ENSDART00000153298 | 10.13       | 34.13666667 | 1.752688017  | 4.82E-09    | 1.97E-06    | yes         | AL732488.1     |
| ENSDART00000153409 | 1.203333333 | 0.276666667 | -2.120815596 | 0.013027877 | 0.307533065 | no          | CR385078.4     |
| ENSDART00000153498 | 0.25        | 0.903333333 | 1.853330351  | 0.01066065  | 0.272620037 | no          | BX294100.1     |
| ENSDART00000153691 | 1.443333333 | 4.39        | 1.604816416  | 0.000118718 | 0.0097151   | yes         | CU928129.1     |
| ENSDART00000153803 | 0.416666667 | 1.58        | 1.922958964  | 0.000131312 | 0.010399072 | yes         | CU466287.2     |
| ENSDART00000154087 | 1.756666667 | 0.45        | -1.964843555 | 0.020817718 | 0.363676093 | no          | AL772300.1     |
| ENSDART00000154324 | 0.09        | 0.5         | 2.473931188  | 0.01415019  | 0.318120759 | no          | CR848791.3     |
| ENSDART00000154808 | 0.39        | 0.001       | -8.607330314 | 0.031336399 | 0.472005501 | no          | CR377211.3     |
| ENSDART00000154910 | 3.796666667 | 1.35        | -1.491773934 | 0.002986817 | 0.124281958 | no          | BX005421.1     |
| ENSDART00000155403 | 0.026666667 | 0.346666667 | 3.700439718  | 0.023243449 | 0.388181407 | no          | AL954322.2     |
| ENSDART00000155862 | 0.933333333 | 0.096666667 | -3.271302022 | 0.027601528 | 0.440011378 | no          | CU683879.2     |
| ENSDART00000156448 | 0.113333333 | 0.633333333 | 2.482392767  | 0.03582457  | 0.50018718  | no          | zgc:194207     |
| ENSDART00000156594 | 0.64        | 0.036666667 | -4.125530882 | 0.01377215  | 0.315987185 | no          | BX571794.3     |
| ENSDART00000158007 | 13.52       | 4.403333333 | -1.618427186 | 1.96E-05    | 0.002829021 | yes         | CU467961.1     |
| ENSDART00000158696 | 1.16        | 0.001       | -10.17990909 | 1.40E-07    | 3.12E-05    | yes         | mhc1zda        |
| ENSDART00000161755 | 7.676666667 | 3.433333333 | -1.160870074 | 0.028654425 | 0.450272629 | no          | CU681842.1     |
| ENSDART00000163057 | 9.71        | 4.816666667 | -1.011436209 | 0.005851191 | 0.19506191  | no          | FP101882.1     |
| ENSDART00000163433 | 0.55        | 0.056666667 | -3.278859373 | 0.040860059 | 0.545170891 | no          | FP016142.4     |
| ENSDART00000164487 | 0.01        | 0.153333333 | 3.938599455  | 0.010229689 | 0.267168995 | no          | FP565451.1     |
| ENSDART00000165941 | 0.52        | 0.001       | -9.022367813 | 0.00011391  | 0.0097151   | yes         | CR382294.1     |
| ENSDART00000167972 | 0.583333333 | 1.273333333 | 1.126217716  | 0.009707391 | 0.264796056 | no          | CU929418.2     |
| ENSDART00000169453 | 4.34        | 12.56333333 | 1.533452346  | 7.15E-08    | 1.95E-05    | yes         | CU469577.1     |
| ENSDART00000170230 | 0.036666667 | 0.46        | 3.649092838  | 0.025304712 | 0.4095959   | no          | BX682557.1     |
| ENSDART00000172918 | 0.246666667 | 1.306666667 | 2.405256478  | 0.003117934 | 0.127575454 | no          | BX005228.1     |
| ENSDART00000173489 | 2.43        | 0.77        | -1.658025963 | 0.019629607 | 0.354343274 | no          | BX957297.2     |
| ENSDART00000173958 | 0.61        | 0.001       | -9.252665432 | 0.003937063 | 0.148699836 | no          | CR318601.1     |
| ENSDART00000174069 | 12.06666667 | 3.173333333 | -1.926956219 | 4.03E-05    | 0.004712892 | yes         | CABZ01015815.1 |
| ENSDART00000174479 | 0.11        | 0.45        | 2.032421478  | 0.002008167 | 0.093019808 | no          | CABZ01077124.2 |

|                    |             |             |              |             |             |     |                |
|--------------------|-------------|-------------|--------------|-------------|-------------|-----|----------------|
| ENSDART00000174625 | 0.16        | 0.001       | -7.321928095 | 0.035858633 | 0.50018718  | no  | CABZ01113900.1 |
| ENSDART00000174821 | 1.02        | 0.386666667 | -1.399406848 | 0.014862678 | 0.318120759 | no  | CR792455.2     |
| ENSDART00000174877 | 0.343333333 | 0.001       | -8.423466121 | 0.015111416 | 0.319872963 | no  | CT009596.2     |
| ENSDART00000175018 | 0.233333333 | 0.59        | 1.338322533  | 0.016744422 | 0.324313784 | no  | CABZ01007102.1 |
| ENSDART00000175043 | 0.233333333 | 1.036666667 | 2.151487753  | 0.044369221 | 0.566814611 | no  | CABZ01040021.1 |
| ENSDART00000175077 | 0.001       | 1.196666667 | 10.22480563  | 5.72E-10    | 2.81E-07    | yes | CABZ01079894.1 |
| ENSDART00000175116 | 0.001       | 0.16        | 7.321928095  | 0.016559362 | 0.324313784 | no  | CABZ01100207.1 |
| ENSDART00000175180 | 0.773333333 | 0.26        | -1.572578776 | 0.049706581 | 0.605975529 | no  | BX000981.13    |
| ENSDART00000175275 | 0.001       | 0.36        | 8.491853096  | 0.014551823 | 0.318120759 | no  | AL928838.1     |
| ENSDART00000175391 | 0.61        | 0.19        | -1.682809824 | 0.049860308 | 0.605975529 | no  | CR846087.5     |
| ENSDART00000175465 | 0.06        | 0.4         | 2.736965594  | 0.022473007 | 0.380491259 | no  | zgc:194629     |
| ENSDART00000175535 | 0.426666667 | 1.29        | 1.596189756  | 0.019290176 | 0.350795424 | no  | CR388179.1     |
| ENSDART00000175572 | 3.84        | 1.6         | -1.263034406 | 0.006625517 | 0.209947861 | no  | CABZ01059417.3 |
| ENSDART00000175591 | 0.366666667 | 0.053333333 | -2.781359714 | 0.042025884 | 0.551268699 | no  | CABZ01087388.1 |
| ENSDART00000175595 | 5.363333333 | 2.516666667 | -1.091615777 | 0.016472039 | 0.324313784 | no  | CABZ01079873.1 |
| ENSDART00000175628 | 7.796666667 | 1.97        | -1.984661826 | 8.31E-05    | 0.008341625 | yes | BX000486.1     |
| ENSDART00000175689 | 0.15        | 0.001       | -7.22881869  | 0.04859064  | 0.602474853 | no  | CABZ01113900.1 |
| ENSDART00000175691 | 0.096666667 | 0.5         | 2.370837695  | 0.007014139 | 0.215246392 | no  | CR384075.1     |
| ENSDART00000175796 | 7.296666667 | 2.816666667 | -1.373248708 | 0.00011763  | 0.0097151   | yes | CR762475.6     |
| ENSDART00000175857 | 2.903333333 | 0.923333333 | -1.652786743 | 0.008622295 | 0.249032181 | no  | BX323033.1     |
| ENSDART00000176028 | 0.143333333 | 0.001       | -7.163230349 | 0.047905358 | 0.59770884  | no  | BX927125.2     |
| ENSDART00000176275 | 6.193333333 | 21.88333333 | 1.821044509  | 1.73E-08    | 5.32E-06    | yes | BX000486.1     |
| ENSDART00000176326 | 0.056666667 | 0.146666667 | 1.371968777  | 0.031338858 | 0.472005501 | no  | AL935115.2     |
| ENSDART00000176355 | 1.966666667 | 4.663333333 | 1.245609103  | 1.26E-05    | 0.001927879 | yes | CABZ01039424.2 |
| ENSDART00000176616 | 5.683333333 | 1.853333333 | -1.616614951 | 0.004733834 | 0.16842845  | no  | CR293509.4     |
| ENSDART00000176635 | 5.153333333 | 2.253333333 | -1.193445168 | 0.001427821 | 0.071554742 | no  | CABZ01118317.1 |
| ENSDART00000176651 | 0.316666667 | 0.75        | 1.243925583  | 0.035702113 | 0.50018718  | no  | CABZ01040256.2 |
| ENSDART00000176730 | 0.001       | 0.65        | 9.344295908  | 2.19E-05    | 0.002989395 | yes | CABZ01078989.1 |
| ENSDART00000176956 | 0.183333333 | 0.001       | -7.518325308 | 0.028321459 | 0.44857537  | no  | CABZ01056628.1 |
| ENSDART00000177055 | 0.48        | 0.1         | -2.263034406 | 0.014849459 | 0.318120759 | no  | CABZ01063170.1 |
| ENSDART00000177136 | 0.001       | 0.126666667 | 6.984893108  | 0.00421511  | 0.154449174 | no  | CABZ01035191.4 |
| ENSDART00000177154 | 0.001       | 0.486666667 | 8.926790153  | 0.018772953 | 0.346523308 | no  | BX324006.5     |
| ENSDART00000177211 | 0.116666667 | 0.001       | -6.866248611 | 0.020140712 | 0.355722646 | no  | FO704769.1     |
| ENSDART00000177676 | 1.776666667 | 0.52        | -1.772589504 | 0.025359909 | 0.4095959   | no  | BX465848.6     |
| ENSDART00000177749 | 5.816666667 | 2.876666667 | -1.015794572 | 0.006787403 | 0.210925006 | no  | FO704848.1     |
| ENSDART00000177950 | 0.96        | 0.001       | -9.906890596 | 4.31E-17    | 5.29E-14    | yes | BX640547.7     |
| ENSDART00000178030 | 0.78        | 0.113333333 | -2.782901878 | 0.003446174 | 0.134029289 | no  | CABZ01087388.1 |
| ENSDART00000178105 | 0.973333333 | 0.116666667 | -3.060541542 | 0.019168211 | 0.350795424 | no  | CABZ01078614.2 |
| ENSDART00000178200 | 0.276666667 | 0.826666667 | 1.579156879  | 0.001387597 | 0.071554742 | no  | FO704589.1     |
| ENSDART00000178293 | 2.216666667 | 0.983333333 | -1.172639386 | 0.028795439 | 0.450272629 | no  | BX664605.3     |
| ENSDART00000178307 | 0.87        | 0.363333333 | -1.259721672 | 0.048917691 | 0.603482065 | no  | CU467943.2     |
| ENSDART00000178421 | 0.326666667 | 0.823333333 | 1.333657387  | 0.006153946 | 0.198788641 | no  | BX936391.3     |

|                    |             |             |              |             |             |     |                |
|--------------------|-------------|-------------|--------------|-------------|-------------|-----|----------------|
| ENSDART00000178490 | 0.303333333 | 0.001       | -8.244760234 | 0.011625633 | 0.285721254 | no  | CR456635.1     |
| ENSDART00000178534 | 0.876666667 | 0.24        | -1.868993988 | 0.031772581 | 0.473257685 | no  | CABZ01067657.1 |
| ENSDART00000178577 | 1.22        | 2.446666667 | 1.003936415  | 0.000649759 | 0.038906311 | yes | CABZ01072848.1 |
| ENSDART00000178589 | 0.15        | 0.89        | 2.568842835  | 0.00142818  | 0.071554742 | no  | CU693368.2     |
| ENSDART00000178636 | 0.12        | 0.001       | -6.906890596 | 0.032509669 | 0.48079058  | no  | AL954138.2     |
| ENSDART00000178670 | 0.466666667 | 1.55        | 1.731803889  | 5.86E-09    | 2.06E-06    | yes | BX936391.2     |
| ENSDART00000178748 | 0.36        | 0.001       | -8.491853096 | 0.011554288 | 0.285721254 | no  | CABZ01040021.1 |
| ENSDART00000178865 | 3.243333333 | 0.81        | -2.001483491 | 0.002578399 | 0.11303518  | no  | FO681289.2     |
| ENSDART00000178999 | 0.05        | 0.001       | -5.64385619  | 0.022358898 | 0.380491259 | no  | CABZ01072077.1 |
| ENSDART00000179105 | 0.19        | 0.71        | 1.901819606  | 0.040193976 | 0.539214274 | no  | CR853282.1     |
| ENSDART00000179116 | 1.686666667 | 0.556666667 | -1.599289282 | 0.003280584 | 0.12990053  | no  | AL954146.2     |
| ENSDART00000179265 | 5.463333333 | 2.433333333 | -1.166847485 | 0.013623385 | 0.315522727 | no  | CABZ01063790.1 |
| ENSDART00000179278 | 0.096666667 | 0.001       | -6.594946589 | 0.016874505 | 0.324313784 | no  | CU570781.2     |
| ENSDART00000179438 | 1.093333333 | 0.323333333 | -1.757639162 | 0.017220759 | 0.327728398 | no  | BX465848.5     |
| ENSDART00000179444 | 0.14        | 0.32        | 1.192645078  | 0.014058874 | 0.318120759 | no  | CABZ01053592.1 |
| ENSDART00000179453 | 2.906666667 | 1.063333333 | -1.450771711 | 0.036859895 | 0.508376641 | no  | CT573356.1     |
| ENSDART00000179474 | 0.001       | 0.263333333 | 8.040746342  | 0.008353778 | 0.246210381 | no  | BX936391.3     |
| ENSDART00000179504 | 0.14        | 0.001       | -7.129283017 | 0.001289779 | 0.068834966 | no  | CABZ01072077.1 |
| ENSDART00000179576 | 2.4         | 1.123333333 | -1.095248315 | 0.006063973 | 0.198494051 | no  | BX296567.2     |
| TCONS_00000016     | 2.43        | 1.063333333 | -1.192362391 | 0.005879667 | 0.19506191  | no  | -              |
| TCONS_00001517     | 2.356666667 | 0.736666667 | -1.677663845 | 0.016726139 | 0.324313784 | no  | -              |
| TCONS_00005787     | 1.716666667 | 0.373333333 | -2.2010737   | 0.003494043 | 0.134029289 | no  | -              |
| TCONS_00006042     | 0.19        | 1.113333333 | 2.550814278  | 0.009562874 | 0.263784885 | no  | -              |
| TCONS_00006389     | 0.001       | 0.63        | 9.299208018  | 0.031185731 | 0.472005501 | no  | -              |
| TCONS_00007545     | 0.8         | 0.173333333 | -2.206450877 | 0.015547823 | 0.323473784 | no  | -              |
| TCONS_00007557     | 0.856666667 | 1.793333333 | 1.065837813  | 0.013235459 | 0.309457643 | no  | -              |
| TCONS_00008660     | 0.803333333 | 0.273333333 | -1.555337332 | 0.016902413 | 0.324313784 | no  | -              |
| TCONS_00010602     | 0.633333333 | 0.213333333 | -1.569855608 | 0.003201816 | 0.128859976 | no  | -              |
| TCONS_00014589     | 0.03        | 0.69        | 4.523561956  | 6.44E-20    | 1.58E-16    | yes | -              |
| TCONS_00017420     | 3.393333333 | 1.58        | -1.102778597 | 0.010467223 | 0.270495091 | no  | -              |
| TCONS_00018049     | 5.496666667 | 1.766666667 | -1.637527134 | 0.017457977 | 0.329687183 | no  | -              |
| TCONS_00018159     | 2.476666667 | 1.18        | -1.06961285  | 0.033007023 | 0.485223005 | no  | -              |
| TCONS_00018577     | 0.73        | 0.001       | -9.511752654 | 0.002697326 | 0.116174316 | no  | -              |
| TCONS_00020260     | 1.346666667 | 0.263333333 | -2.354430735 | 0.009233232 | 0.260546952 | no  | -              |
| TCONS_00027070     | 0.506666667 | 0.053333333 | -3.247927513 | 0.042171379 | 0.551268699 | no  | -              |
| TCONS_00027601     | 0.556666667 | 1.36        | 1.288721049  | 0.00058158  | 0.035694448 | yes | -              |
| TCONS_00029335     | 4.87        | 1.796666667 | -1.438599    | 0.000239532 | 0.017295598 | yes | -              |
| TCONS_00029336     | 2.706666667 | 1.286666667 | -1.07287888  | 0.03328993  | 0.486468919 | no  | -              |
| TCONS_00029966     | 0.12        | 1.7         | 3.824428435  | 2.79E-12    | 1.71E-09    | yes | -              |
| TCONS_00036349     | 0.026666667 | 0.356666667 | 3.741466986  | 0.019908326 | 0.355722646 | no  | -              |
| TCONS_00036351     | 0.21        | 0.82        | 1.965234582  | 0.004587946 | 0.165638329 | no  | -              |
| TCONS_00037387     | 0.67        | 0.176666667 | -1.923131237 | 0.016111482 | 0.324313784 | no  | -              |

|                |             |             |              |             |             |     |   |
|----------------|-------------|-------------|--------------|-------------|-------------|-----|---|
| TCONS_00037421 | 14.10666667 | 6.15        | -1.197718811 | 0.000704183 | 0.040369176 | yes | - |
| TCONS_00038949 | 0.756666667 | 0.001       | -9.563514081 | 0.021985484 | 0.380101149 | no  | - |
| TCONS_00044430 | 1.393333333 | 0.216666667 | -2.684991319 | 0.030354175 | 0.466345645 | no  | - |
| TCONS_00044431 | 1.176666667 | 0.156666667 | -2.908935522 | 0.020887303 | 0.363676093 | no  | - |
| TCONS_00044494 | 4.95        | 1.84        | -1.427722759 | 0.000577282 | 0.035694448 | yes | - |
| TCONS_00045363 | 4.91        | 2.366666667 | -1.052866501 | 0.001795929 | 0.086451104 | no  | - |
| TCONS_00045778 | 0.243333333 | 0.613333333 | 1.333737397  | 0.042588828 | 0.553204085 | no  | - |
| TCONS_00046349 | 0.46        | 0.113333333 | -2.021061616 | 0.038679368 | 0.52585952  | no  | - |
| TCONS_00048399 | 0.646666667 | 0.23        | -1.491388385 | 0.016427089 | 0.324313784 | no  | - |
| TCONS_00048649 | 0.29        | 0.03        | -3.273018494 | 1.13E-06    | 0.000184127 | yes | - |
| TCONS_00049225 | 1.63        | 0.376666667 | -2.113511693 | 0.036856283 | 0.508376641 | no  | - |
| TCONS_00050633 | 5.37        | 19.37       | 1.850829961  | 2.36E-12    | 1.71E-09    | yes | - |
| TCONS_00050783 | 1.176666667 | 0.236666667 | -2.313777254 | 0.016909232 | 0.324313784 | no  | - |
| TCONS_00051226 | 0.433333333 | 0.01        | -5.437405312 | 0.000536909 | 0.034687134 | yes | - |
| TCONS_00051830 | 0.593333333 | 0.07        | -3.083416008 | 0.00908879  | 0.259453257 | no  | - |
| TCONS_00052484 | 3.693333333 | 1.546666667 | -1.255761171 | 0.004959168 | 0.171475452 | no  | - |
| TCONS_00054345 | 0.056666667 | 0.353333333 | 2.640457613  | 0.000707077 | 0.040369176 | yes | - |
| TCONS_00054435 | 1.193333333 | 0.42        | -1.506535854 | 0.008424306 | 0.246210381 | no  | - |
| TCONS_00054942 | 0.006666667 | 0.316666667 | 5.569855608  | 5.35E-07    | 9.39E-05    | yes | - |
| TCONS_00056520 | 0.001       | 0.22        | 7.781359714  | 0.005312136 | 0.181129076 | no  | - |
| TCONS_00057087 | 4.743333333 | 2.106666667 | -1.170939198 | 0.000790794 | 0.043142199 | yes | - |
| TCONS_00057233 | 0.64        | 0.001       | -9.321928095 | 0.004855103 | 0.170275406 | no  | - |
| TCONS_00059403 | 0.99        | 0.176666667 | -2.486398666 | 0.027348046 | 0.43881995  | no  | - |
| TCONS_00059967 | 2.116666667 | 6.533333333 | 1.626025157  | 4.41E-07    | 8.32E-05    | yes | - |
| TCONS_00059970 | 1.45        | 4.08        | 1.492516252  | 0.000170093 | 0.012653924 | yes | - |
| TCONS_00060162 | 0.68        | 0.05        | -3.765534746 | 0.00221934  | 0.100897753 | no  | - |
| TCONS_00062691 | 0.466666667 | 0.001       | -8.866248611 | 0.025299112 | 0.4095959   | no  | - |
| TCONS_00063057 | 1.04        | 2.323333333 | 1.159612627  | 8.49E-05    | 0.008341625 | yes | - |
| TCONS_00063634 | 0.793333333 | 0.096666667 | -3.036836768 | 0.01796159  | 0.336608423 | no  | - |
| TCONS_00063727 | 1.323333333 | 0.44        | -1.588601078 | 0.000439334 | 0.029150402 | yes | - |
| TCONS_00064933 | 0.41        | 2.33        | 2.50663414   | 0.009925888 | 0.267168995 | no  | - |
| TCONS_00067059 | 0.001       | 0.416666667 | 8.702749879  | 0.015330681 | 0.321682234 | no  | - |
| TCONS_00067060 | 0.87        | 0.143333333 | -2.601641242 | 0.042215281 | 0.551268699 | no  | - |
| TCONS_00069725 | 0.001       | 0.686666667 | 9.423466121  | 3.49E-05    | 0.004318545 | yes | - |
| TCONS_00070224 | 0.38        | 0.001       | -8.569855608 | 5.30E-05    | 0.005918683 | yes | - |
| TCONS_00071549 | 1.916666667 | 0.66        | -1.538061526 | 0.02294893  | 0.385887828 | no  | - |
| TCONS_00076154 | 0.156666667 | 0.001       | -7.291554446 | 0.008417328 | 0.246210381 | no  | - |

---

Table S3

| GeneID             | T3dpa_fpkm  | T7dpa_fpkm  | log2(FC)     | Pvalue      | FDR         | significant | Symbol             |
|--------------------|-------------|-------------|--------------|-------------|-------------|-------------|--------------------|
| ENSDART0000007434  | 0.813333333 | 1.76        | 1.113656782  | 0.010685968 | 0.34967118  | no          | BX005421.1         |
| ENSDART00000124127 | 0.31        | 0.001       | -8.276124405 | 0.030627567 | 0.536533287 | no          | CU179643.1         |
| ENSDART00000142301 | 0.58        | 0.001       | -9.17990909  | 0.025421939 | 0.494771036 | no          | BX005355.1         |
| ENSDART00000144731 | 0.001       | 0.223333333 | 7.803054785  | 0.049851153 | 0.717265134 | no          | CR377211.3         |
| ENSDART00000145442 | 0.56        | 0.116666667 | -2.263034406 | 0.041431751 | 0.672575419 | no          | CR936321.1         |
| ENSDART00000145874 | 6.726666667 | 16.46666667 | 1.291584867  | 0.00166697  | 0.093166873 | no          | BX936337.1         |
| ENSDART00000148196 | 5.576666667 | 18.89666667 | 1.760656824  | 2.36E-06    | 0.000796007 | yes         | AL929237.1         |
| ENSDART00000148329 | 0.306666667 | 0.83        | 1.436439976  | 0.02081609  | 0.470239717 | no          | BX088709.1         |
| ENSDART00000152541 | 0.976666667 | 2.003333333 | 1.036464326  | 0.049724919 | 0.717265134 | no          | BX548015.2         |
| ENSDART00000153479 | 0.01        | 0.186666667 | 4.222392421  | 0.012090161 | 0.367994263 | no          | CR377211.3         |
| ENSDART00000154324 | 1.006666667 | 0.5         | -1.009586049 | 0.024126967 | 0.486509179 | no          | CR848791.3         |
| ENSDART00000155205 | 2.983333333 | 0.153333333 | -4.282181916 | 2.62E-06    | 0.000796007 | yes         | CU927934.1         |
| ENSDART00000155541 | 5.64        | 37.85       | 2.746526232  | 3.28E-09    | 1.99E-06    | yes         | CU693494.2         |
| ENSDART00000155813 | 0.283333333 | 0.001       | -8.14635653  | 0.001480324 | 0.092425355 | no          | CU927934.3         |
| ENSDART00000155964 | 0.186666667 | 0.013333333 | -3.807354922 | 0.018891503 | 0.450988331 | no          | CR628341.1         |
| ENSDART00000158002 | 0.206666667 | 0.02        | -3.36923381  | 0.008715565 | 0.298907058 | no          | CR812832.1         |
| ENSDART00000158007 | 2.066666667 | 4.403333333 | 1.091290346  | 0.048276556 | 0.717265134 | no          | CU467961.1         |
| ENSDART00000160098 | 0.076666667 | 0.903333333 | 3.558587085  | 0.024328268 | 0.486509179 | no          | BX901923.2         |
| ENSDART00000165941 | 0.22        | 0.001       | -7.781359714 | 0.017601629 | 0.432928963 | no          | CR382294.1         |
| ENSDART00000169452 | 0.013333333 | 0.286666667 | 4.426264755  | 0.021159784 | 0.470239717 | no          | CR848841.2         |
| ENSDART00000172786 | 0.62        | 0.203333333 | -1.608421474 | 0.049227905 | 0.717265134 | no          | CT574585.2         |
| ENSDART00000174069 | 1.13        | 3.173333333 | 1.4896763    | 0.008588795 | 0.298907058 | no          | CABZ010158<br>15.1 |
| ENSDART00000174163 | 1.373333333 | 0.326666667 | -2.071790683 | 0.017016545 | 0.428631707 | no          | CABZ010682<br>73.1 |
| ENSDART00000174415 | 4.23        | 8.59        | 1.022000468  | 0.044349387 | 0.694197185 | no          | CR376839.1         |
| ENSDART00000174436 | 0.016666667 | 0.716666667 | 5.426264755  | 0.020250621 | 0.469024085 | no          | FP101914.2         |
| ENSDART00000174739 | 0.106666667 | 0.496666667 | 2.21916852   | 0.035603812 | 0.606260717 | no          | CABZ010023<br>39.2 |
| ENSDART00000174873 | 0.19        | 0.52        | 1.452512205  | 0.047469026 | 0.717265134 | no          | CABZ010049<br>03.1 |
| ENSDART00000174983 | 1.163333333 | 2.913333333 | 1.324406243  | 0.017426259 | 0.432928963 | no          | CABZ010771<br>21.1 |
| ENSDART00000175043 | 0.016666667 | 1.036666667 | 5.958842675  | 0.000672028 | 0.046753923 | yes         | CABZ010400<br>21.1 |
| ENSDART00000175059 | 0.62        | 2.473333333 | 1.996116566  | 2.38E-07    | 9.66E-05    | yes         | BX571711.3         |
| ENSDART00000175370 | 0.413333333 | 0.001       | -8.691161905 | 0.001781799 | 0.096008906 | no          | FO834828.1         |
| ENSDART00000175489 | 0.093333333 | 0.001       | -6.544320516 | 0.045181412 | 0.697451743 | no          | BX546499.3         |
| ENSDART00000175491 | 1.813333333 | 0.816666667 | -1.150824902 | 0.000667696 | 0.046753923 | yes         | BX936350.2         |

|                    |             |             |              |             |             |     |            |
|--------------------|-------------|-------------|--------------|-------------|-------------|-----|------------|
| ENSDART00000175603 | 0.37        | 0.136666667 | -1.436863862 | 0.011260089 | 0.351516867 | no  | CR792418.4 |
| ENSDART00000175679 | 0.406666667 | 0.02        | -4.345774837 | 0.001029046 | 0.067722344 | no  | CABZ010728 |
| ENSDART00000175748 | 0.316666667 | 0.126666667 | -1.321928095 | 0.014822422 | 0.416437168 | no  | 45.1       |
| ENSDART00000175900 | 0.001       | 0.4         | 8.64385619   | 0.012268651 | 0.368816866 | no  | fancb      |
| ENSDART00000176026 | 0.001       | 0.106666667 | 6.736965594  | 0.000555998 | 0.04102589  | yes | FO681360.2 |
| ENSDART00000176069 | 0.743333333 | 0.09        | -3.046012398 | 0.009871552 | 0.329277099 | no  | CABZ010440 |
| ENSDART00000176229 | 0.001       | 0.74        | 9.531381461  | 1.16E-14    | 9.43E-12    | yes | 23.1       |
| ENSDART00000176548 | 2.23        | 1.096666667 | -1.023918627 | 0.005356636 | 0.228831751 | no  | CABZ010573 |
| ENSDART00000176651 | 0.14        | 0.75        | 2.421463768  | 0.022966791 | 0.485277377 | no  | 64.1       |
| ENSDART00000176661 | 0.001       | 0.153333333 | 7.26052755   | 0.023621789 | 0.486509179 | no  | FO818685.1 |
| ENSDART00000176871 | 4.32        | 11.42666667 | 1.403301391  | 0.000444838 | 0.033849364 | yes | CABZ010663 |
| ENSDART00000177123 | 0.66        | 1.836666667 | 1.476551888  | 0.021629096 | 0.470239717 | no  | 26.1       |
| ENSDART00000177154 | 0.001       | 0.486666667 | 8.926790153  | 0.027475336 | 0.504756037 | no  | CABZ010402 |
| ENSDART00000177161 | 0.001       | 0.35        | 8.451211112  | 0.01368059  | 0.39657425  | no  | 56.2       |
| ENSDART00000177366 | 0.973333333 | 2.94        | 1.594810287  | 0.000335776 | 0.030282043 | yes | FO704848.1 |
| ENSDART00000177369 | 0.076666667 | 1.36        | 4.148863386  | 8.36E-05    | 0.011314184 | yes | CABZ010300 |
| ENSDART00000177544 | 1.736666667 | 12.07666667 | 2.797829528  | 1.74E-07    | 8.48E-05    | yes | 33.1       |
| ENSDART00000177561 | 0.326666667 | 0.043333333 | -2.914270126 | 0.002312397 | 0.117305977 | no  | CABZ011019 |
| ENSDART00000177793 | 0.28        | 0.026666667 | -3.392317423 | 0.026211689 | 0.494771036 | no  | 91.1       |
| ENSDART00000178105 | 0.57        | 0.116666667 | -2.288569498 | 0.032332935 | 0.559908895 | no  | BX324006.5 |
| ENSDART00000178146 | 0.77        | 0.001       | -9.588714636 | 0.004440911 | 0.196611242 | no  | CABZ010841 |
| ENSDART00000178572 | 0.053333333 | 0.001       | -5.736965594 | 0.027777129 | 0.504756037 | no  | 43.1       |
| ENSDART00000178766 | 0.263333333 | 0.116666667 | -1.174497731 | 0.049851175 | 0.717265134 | no  | CR925768.4 |
| ENSDART00000179287 | 1.753333333 | 6.113333333 | 1.801858934  | 1.06E-05    | 0.002586177 | yes | CABZ010594 |
| ENSDART00000179304 | 0.001       | 0.156666667 | 7.291554446  | 0.042889144 | 0.691622945 | no  | 17.3       |
| ENSDART00000179343 | 0.093333333 | 0.7         | 2.906890596  | 0.015203182 | 0.416437168 | no  | CABZ010880 |
| ENSDART00000179468 | 0.466666667 | 1.34        | 1.521768674  | 0.002857227 | 0.141986698 | no  | 53.1       |
| ENSDART00000179504 | 0.07        | 0.001       | -6.129283017 | 0.004113551 | 0.193226855 | no  | BX640537.3 |
| TCONS_00001351     | 1.226666667 | 5.336666667 | 2.121195636  | 2.88E-05    | 0.005396138 | yes | CU855942.1 |
| TCONS_00003006     | 0.066666667 | 0.366666667 | 2.459431619  | 0.032421829 | 0.559908895 | no  | CABZ010786 |
|                    |             |             |              |             |             |     | 14.2       |
|                    |             |             |              |             |             |     | CABZ010690 |
|                    |             |             |              |             |             |     | 95.1       |
|                    |             |             |              |             |             |     | CU570781.2 |
|                    |             |             |              |             |             |     | FO904911.1 |
|                    |             |             |              |             |             |     | CR790382.5 |
|                    |             |             |              |             |             |     | CR925768.4 |
|                    |             |             |              |             |             |     | BX255935.4 |
|                    |             |             |              |             |             |     | BX640547.7 |
|                    |             |             |              |             |             |     | CABZ010720 |
|                    |             |             |              |             |             |     | 77.1       |
|                    |             |             |              |             |             |     | -          |
|                    |             |             |              |             |             |     | -          |

|                |             |             |              |             |             |     |   |
|----------------|-------------|-------------|--------------|-------------|-------------|-----|---|
| TCONS_00006042 | 0.136666667 | 1.113333333 | 3.026152288  | 0.01120594  | 0.351516867 | no  | - |
| TCONS_00006052 | 0.1         | 0.001       | -6.64385619  | 0.024311173 | 0.486509179 | no  | - |
| TCONS_00014393 | 1.373333333 | 2.933333333 | 1.094859186  | 0.02838438  | 0.505864654 | no  | - |
| TCONS_00014589 | 3.26        | 0.69        | -2.240203697 | 6.18E-15    | 7.53E-12    | yes | - |
| TCONS_00014742 | 0.31        | 0.001       | -8.276124405 | 0.02616544  | 0.494771036 | no  | - |
| TCONS_00015085 | 0.63        | 0.046666667 | -3.754887502 | 0.024927574 | 0.489505188 | no  | - |
| TCONS_00017671 | 1.51        | 4.573333333 | 1.598697526  | 0.001622285 | 0.093166873 | no  | - |
| TCONS_00018577 | 0.546666667 | 0.001       | -9.094517599 | 4.43E-05    | 0.007185106 | yes | - |
| TCONS_00018578 | 0.001       | 0.69        | 9.430452552  | 0.001964332 | 0.101769115 | no  | - |
| TCONS_00020260 | 0.653333333 | 0.263333333 | -1.310929096 | 0.040523904 | 0.666727746 | no  | - |
| TCONS_00025684 | 20.07       | 42.45333333 | 1.080837218  | 0.016507385 | 0.427611518 | no  | - |
| TCONS_00025686 | 23.06333333 | 51.62       | 1.162329101  | 0.022703433 | 0.484937362 | no  | - |
| TCONS_00025687 | 40.69333333 | 81.79       | 1.007132002  | 0.03620512  | 0.612218525 | no  | - |
| TCONS_00029129 | 2.083333333 | 4.726666667 | 1.181929438  | 0.01622225  | 0.427611518 | no  | - |
| TCONS_00029335 | 0.47        | 1.796666667 | 1.93459011   | 2.49E-05    | 0.005061016 | yes | - |
| TCONS_00029336 | 0.383333333 | 1.286666667 | 1.746966986  | 0.003701292 | 0.180252931 | no  | - |
| TCONS_00030057 | 1.88        | 4.656666667 | 1.308564953  | 0.001813721 | 0.096008906 | no  | - |
| TCONS_00030110 | 1.786666667 | 4.6         | 1.364363361  | 0.005720966 | 0.236111071 | no  | - |
| TCONS_00035535 | 0.513333333 | 0.176666667 | -1.538866086 | 0.000373039 | 0.031322406 | yes | - |
| TCONS_00037421 | 2.29        | 6.15        | 1.425238812  | 3.33E-05    | 0.005792808 | yes | - |
| TCONS_00039837 | 3.616666667 | 1.066666667 | -1.761551232 | 5.02E-05    | 0.007579358 | yes | - |
| TCONS_00041256 | 0.453333333 | 1.52        | 1.745427173  | 0.016376249 | 0.427611518 | no  | - |
| TCONS_00045712 | 0.596666667 | 0.19        | -1.650925763 | 0.045542023 | 0.697451743 | no  | - |
| TCONS_00046249 | 1.846666667 | 3.793333333 | 1.038542676  | 0.018684605 | 0.450465471 | no  | - |
| TCONS_00047310 | 0.206666667 | 0.63        | 1.608046114  | 0.043571104 | 0.693435551 | no  | - |
| TCONS_00047900 | 0.563333333 | 0.183333333 | -1.619519723 | 0.037210398 | 0.624878061 | no  | - |
| TCONS_00047994 | 0.32        | 0.883333333 | 1.464886049  | 0.026562925 | 0.496259093 | no  | - |
| TCONS_00049212 | 0.403333333 | 1.016666667 | 1.333802195  | 0.024425366 | 0.486509179 | no  | - |
| TCONS_00051226 | 0.163333333 | 0.01        | -4.029747343 | 0.021587284 | 0.470239717 | no  | - |
| TCONS_00051764 | 5.496666667 | 21.90666667 | 1.994741082  | 0.001683508 | 0.093166873 | no  | - |
| TCONS_00052313 | 0.001       | 2.866666667 | 11.48515844  | 0.000159057 | 0.016845951 | yes | - |
| TCONS_00057087 | 0.996666667 | 2.106666667 | 1.079779074  | 0.01502522  | 0.416437168 | no  | - |
| TCONS_00057233 | 0.263333333 | 0.001       | -8.040746342 | 0.028091666 | 0.505864654 | no  | - |
| TCONS_00059536 | 1.656666667 | 3.5         | 1.079071571  | 0.007327869 | 0.270353958 | no  | - |
| TCONS_00059967 | 2.153333333 | 6.533333333 | 1.601247584  | 0.000144944 | 0.016806592 | yes | - |
| TCONS_00059970 | 1.7         | 4.08        | 1.263034406  | 0.020417476 | 0.469024085 | no  | - |
| TCONS_00060266 | 1.633333333 | 0.693333333 | -1.236198221 | 1.12E-05    | 0.002586177 | yes | - |
| TCONS_00060703 | 0.243333333 | 1.226666667 | 2.333737397  | 0.02269883  | 0.484937362 | no  | - |
| TCONS_00063057 | 1.063333333 | 2.323333333 | 1.127602232  | 0.025692323 | 0.494771036 | no  | - |
| TCONS_00064933 | 0.001       | 2.33        | 11.18611424  | 3.49E-20    | 8.51E-17    | yes | - |
| TCONS_00070223 | 0.35        | 1.116666667 | 1.673771768  | 0.006851864 | 0.260692016 | no  | - |
| TCONS_00075414 | 0.046666667 | 0.55        | 3.558967292  | 0.000728885 | 0.049300987 | yes | - |



Table S4

| the target genes of DE lncRNAs (cis) GO Enrichment (Biological Process) |                                                               |                |             |             |  |
|-------------------------------------------------------------------------|---------------------------------------------------------------|----------------|-------------|-------------|--|
| GO ID                                                                   | Description                                                   | cis-mRNA (448) | pvalue      | p.adjust    |  |
| 1 GO:0043234                                                            | protein complex                                               | 70             | 0.000768679 | 0.049194378 |  |
| 2 GO:0031227                                                            | intrinsic component of endoplasmic reticulum membrane         | 6              | 0.000872798 | 0.049194378 |  |
| 3 GO:0005793                                                            | endoplasmic reticulum-Golgi intermediate compartment          | 4              | 0.00094044  | 0.049194378 |  |
| 4 GO:0032991                                                            | macromolecular complex                                        | 97             | 0.000978993 | 0.049194378 |  |
| 5 GO:0000123                                                            | histone acetyltransferase complex                             | 5              | 0.002083464 | 0.083755258 |  |
| 6 GO:0008023                                                            | transcription elongation factor complex                       | 4              | 0.004246158 | 0.142246291 |  |
| 7 GO:0005789                                                            | endoplasmic reticulum membrane                                | 7              | 0.006257513 | 0.179680025 |  |
| 8 GO:0005657                                                            | replication fork                                              | 2              | 0.008975421 | 0.20260756  |  |
| 9 GO:0031248                                                            | protein acetyltransferase complex                             | 5              | 0.011155905 | 0.20260756  |  |
| 10 GO:1902493                                                           | acetyltransferase complex                                     | 5              | 0.011155905 | 0.20260756  |  |
| 11 GO:0015934                                                           | large ribosomal subunit                                       | 3              | 0.012200253 | 0.20260756  |  |
| 12 GO:0000777                                                           | condensed chromosome kinetochore                              | 2              | 0.0131888   | 0.20260756  |  |
| 13 GO:0000779                                                           | condensed chromosome, centromeric region                      | 2              | 0.0131888   | 0.20260756  |  |
| 14 GO:0034704                                                           | calcium channel complex                                       | 5              | 0.014617644 | 0.20260756  |  |
| 15 GO:0042175                                                           | nuclear outer membrane-endoplasmic reticulum membrane network | 16             | 0.01514811  | 0.20260756  |  |
| 16 GO:0034703                                                           | cation channel complex                                        | 6              | 0.016127965 | 0.20260756  |  |
| 17 GO:0070461                                                           | SAGA-type complex                                             | 2              | 0.018089069 | 0.21387664  |  |
| 18 GO:0044432                                                           | endoplasmic reticulum part                                    | 7              | 0.019162506 | 0.213981315 |  |
| 19 GO:0044427                                                           | chromosomal part                                              | 16             | 0.021489059 | 0.223005497 |  |
| 20 GO:0000776                                                           | kinetochore                                                   | 4              | 0.022189602 | 0.223005497 |  |
| 21 GO:0031091                                                           | platelet alpha granule                                        | 1              | 0.03093709  | 0.241522632 |  |
| 22 GO:0042611                                                           | MHC protein complex                                           | 4              | 0.031672309 | 0.241522632 |  |
| 23 GO:0030424                                                           | axon                                                          | 3              | 0.032909093 | 0.241522632 |  |
| 24 GO:0033267                                                           | axon part                                                     | 3              | 0.032909093 | 0.241522632 |  |
| 25 GO:0034702                                                           | ion channel complex                                           | 6              | 0.0335913   | 0.241522632 |  |
| 26 GO:1902495                                                           | transmembrane transporter complex                             | 6              | 0.035443027 | 0.241522632 |  |
| 27 GO:1990351                                                           | transporter complex                                           | 6              | 0.035443027 | 0.241522632 |  |
| 28 GO:0000808                                                           | origin recognition complex                                    | 2              | 0.036458711 | 0.241522632 |  |
| 29 GO:0005783                                                           | endoplasmic reticulum                                         | 7              | 0.037087462 | 0.241522632 |  |
| 30 GO:0098796                                                           | membrane protein complex                                      | 14             | 0.037500351 | 0.241522632 |  |
| 31 GO:0005654                                                           | nucleoplasm                                                   | 12             | 0.040013414 | 0.241522632 |  |
| 32 GO:0044451                                                           | nucleoplasm part                                              | 12             | 0.040013414 | 0.241522632 |  |
| 33 GO:0031300                                                           | intrinsic component of organelle membrane                     | 8              | 0.040283474 | 0.241522632 |  |
| 34 GO:0044437                                                           | vacuolar part                                                 | 3              | 0.040854575 | 0.241522632 |  |
| 35 GO:0036338                                                           | viral membrane                                                | 2              | 0.043664669 | 0.250759957 |  |

Table S5

| the target genes of DE lncRNAs (cis) Pathway Enrichment |                |             |                 |            |            |
|---------------------------------------------------------|----------------|-------------|-----------------|------------|------------|
| Pathway                                                 | cis-mRNA (367) | All (14723) | Pvalue          | Qvalue     | Pathway ID |
| 1 Proteasome                                            |                | 9           | 91 0.000436453  | 0.03133835 | ko03050    |
| 2 Gap junction                                          |                | 19          | 323 0.000493517 | 0.03133835 | ko04540    |
| 3 Wnt signaling pathway                                 |                | 25          | 504 0.000874514 | 0.03702107 | ko04310    |
| 4 Toll-like receptor signaling pathway                  |                | 15          | 261 0.002360868 | 0.07495756 | ko04620    |
| 5 N-Glycan biosynthesis                                 |                | 9           | 132 0.005814242 | 0.14768175 | ko00510    |
| 6 Peroxisome                                            |                | 11          | 194 0.009498752 | 0.20105692 | ko04146    |
| 7 Jak-STAT signaling pathway                            |                | 18          | 412 0.01542273  | 0.22160747 | ko04630    |
| 8 Cell cycle                                            |                | 16          | 361 0.01920199  | 0.22160747 | ko04110    |
| 9 Cell adhesion molecules (CAMs)                        |                | 22          | 551 0.02045628  | 0.22160747 | ko04514    |
| 10 Oocyte meiosis                                       |                | 15          | 335 0.02114916  | 0.22160747 | ko04114    |
| 11 Nitrogen metabolism                                  |                | 4           | 43 0.02182489   | 0.22160747 | ko00910    |
| 12 MAPK signaling pathway                               |                | 34          | 955 0.02282244  | 0.22160747 | ko04010    |
| 13 Biosynthesis of amino acids                          |                | 10          | 193 0.02304499  | 0.22160747 | ko01230    |
| 14 Caffeine metabolism                                  |                | 2           | 10 0.02442917   | 0.22160747 | ko00232    |
| 15 RIG-I-like receptor signaling pathway                |                | 9           | 172 0.0285858   | 0.24202644 | ko04622    |
| 16 Ras signaling pathway                                |                | 2           | 12 0.03467532   | 0.25904504 | ko04014    |
| 17 Circadian entrainment                                |                | 2           | 12 0.03467532   | 0.25904504 | ko04713    |
| 18 Basal transcription factors                          |                | 6           | 100 0.03889271  | 0.27440968 | ko03022    |
| 19 Hedgehog signaling pathway                           |                | 7           | 130 0.04418766  | 0.29535962 | ko04340    |
| 20 VEGF signaling pathway                               |                | 10          | 220 0.04935045  | 0.30327265 | ko04370    |

Table S6

| LncRNA             | chr | start    | end      | strand | GeneID            | chr | start    | end      | strand | up/down_Stream | distance | correlation       |
|--------------------|-----|----------|----------|--------|-------------------|-----|----------|----------|--------|----------------|----------|-------------------|
| ENSDART00000154324 | 15  | 17440345 | 17442041 | +      | ENSDART0000018461 | 15  | 17407297 | 17437330 | +      | DOWNSTREAM     | 3014     | 0.858410361516328 |
